# Supplementary material for: Concave octopus-like PtCu nanoframe mediated photo-electro Fenton catalysis for fast organic dyestuff elimination
Source: Royal Society of Chemistry journal article supplement (doi:10.1039/d2na00233g), 2022-01-01
Supplement: d2na00233g1.pdf [file d2na00233g1.pdf]

## Supporting Information

*for*

### **Concave Octopus-Like PtCu Nanoframes Mediated Photo-Electro Fenton Catalysis for Fast Organic Dyestuff Elimination**

Yangyang Yan,<sup>†a</sup> Shaowen Cheng,<sup>†a</sup> Ping Zhou,<sup>a</sup> Heying Li,<sup>a, b</sup> Xiaoran Liu,<sup>a</sup> Manping Lin,<sup>a</sup> Feihu Xie,<sup>b</sup> Keke Zhang,<sup>b\*</sup> Yi Zhang,<sup>b</sup> Chenyang Zhang,<sup>b</sup> Shuang Zhao,<sup>c</sup> Jiahua Shi,<sup>c\*</sup> Jinghua Li,<sup>a, b, c\*</sup>

<sup>a</sup> The 1st Affiliated Hospital, Department of Wound Repair, Engineering Research Center of Biomaterials and Medical Devices of Hainan Province, College of Emergency and Trauma, Hainan Medical University, Haikou 570100, China

<sup>b</sup> College of Medical Technology and Engineering, College of Materials Science and Engineering, the 1st Affiliated Hospital, Henan University of Science and Technology, Luoyang 471003, China

<sup>c</sup> College of Chemistry and Chemical Engineering, Key Laboratory of Natural Medicine and Immune-Engineering of Henan Province, Henan University, Kaifeng 475004, China

†These authors contributed equally to this work.

\* Corresponding author: Dr. Jinghua Li

The 1st Affiliated Hospital, Engineering Research Center of Biomaterials and Medical Devices of Hainan Province, College of Emergency and Trauma  
Hainan Medical University, Haikou 570100, China

E-mail: anubiss1860@163.com    Tel: +86-23-65111802

## **List of Contents**

|                                                                                |     |
|--------------------------------------------------------------------------------|-----|
| <b>Experiment section</b>                                                      | S3  |
| <b>Fig. S1.</b> Particle size distribution of the as-synthesized COPC-Nfs      | S5  |
| <b>Fig. S2.</b> Atomic arrangement of the obtained COPC-Nfs                    | S6  |
| <b>Fig. S3.</b> XPS spectra of Cu 2p of the as-synthesized COPC-Nfs            | S7  |
| <b>Fig. S4.</b> UV-Vis absorbance spectrum of the as-prepared COPC-Nfs         | S8  |
| <b>Fig. S5.</b> Zeta potential of COPC-Nfs                                     | S9  |
| <b>Fig. S6.</b> Degradation of MB-H under different pH                         | S10 |
| <b>Fig. S7.</b> Decoloration variance during the dye degradation process       | S11 |
| <b>Fig. S8.</b> TOC results for the dye degradation                            | S12 |
| <b>Fig. S9.</b> Reusability of COPC-Nfs within 10 cycles                       | S13 |
| <b>Fig. S10.</b> H <sub>2</sub> O <sub>2</sub> generation profiles             | S14 |
| <b>Table S1.</b> Photo degradation of dye with different nanocatalysts         | S15 |
| <b>Table S2.</b> Photo-electro degradation of dye with different nanocatalysts | S16 |
| <b>Reference</b>                                                               | S17 |

## **Experiment section**

### **Chemicals and Materials**

All chemicals were purchased and used without further purification. Platinum acetylacetonate ( $\text{Pt}(\text{acac})_2$ ,  $\geq 99.98\%$ ), cetyltrimethylammonium bromide (CTAB,  $\geq 98\%$ ), and cupric acetylacetonate, ( $\text{Cu}(\text{acac})_2$ ) were bought from Sigma-Aldrich CO., Ltd (America). Oleylamine (OAM, 80-90%) and methylene blue (MB, 99%) were supplied by Aladdin Co., Ltd (Shanghai, China).

### **Fabrication of COPC-Nfs**

The COPC-Nfs nanoparticles were fabricated by a solvothermally method via our previous report<sup>[1, 2]</sup>. Typically, 39.5 mg  $\text{Pt}(\text{acac})_2$ , 130.0 mg  $\text{Cu}(\text{acac})_2$ , and 750.0 mg CTAB were dissolved in 30.0 mL oleylamine, then the mixture was added into a teflon-lined high-pressure reaction kettle (50 mL) in a 170 °C oil bath for continuous 48 h. The autoclave was then cooled down to room temperature. The black products were collected by centrifugation (3500 rpm, 5 min) and re-dispersed in cyclohexane, the obtained black nanoparticles was the oleate-capped COPC-Nfs. Then the solution was regulated to pH 4.0 by 0.1 M HCl solution. The nanoparticles are kept in 50 °C suspension for 5 h to remove the superficial oleylamine on the surface of PtCu nanoframes. The oleate-free COPC-Nfs were finally collected with a centrifuge (10000 rpm, 5 min) and washed with acetone and ethanol every 6 times.

### **Characterization of COPC-Nfs**

The morphological feature of the obtained nanoframes was monitored by SEM (Nova-400, FEI), TEM (LIBRA 200-FEG, Zeiss) and HAADF-STEM (Titan G2

80-200, FEI). The crystalline structure of the nanoagents was measured by the XRD spectrograph (D/max 2500-PC, Rigaku). The elementary composition of the nanocomposites was recorded by an XPS Spectrometer (Quantera II, ULVAC-PHI).

### **Photothermal thermogenesis of COPC-Nfs**

The UV-vis-NIR absorption of the nanoagents was detected by a UV-vis-NIR spectrophotometer (NanoDrop One, Thermo). Then the COPC-Nfs nanoframes with various concentrations 50, 100, 300 and 600  $\mu\text{g}\cdot\text{mL}^{-1}$ ) were treated by 808 nm NIR laser ( $2.0\text{ W}\cdot\text{cm}^{-2}$ , 5 min). A thermal infrared imager was used in this study to record the temperature variation. Next, the thermogenesis stability of the obtained COPC-Nfs was further investigated by a 6 on-off cyclic photothermal thermogenesis experiment.

### **Monitoring the production of Hydroxyl radicals ( $\bullet\text{OH}$ )**

To detect the Hydroxyl radical levels induced by COPC-Nfs under DC and NIR laser treatment, we used 5, 5-dimethyl-1-pyrroline-N-oxide (DMPO) as the  $\bullet\text{OH}$  specific spin-trapping agent to determine the generation of  $\bullet\text{OH}$  reactive oxygen. Typically, the electrolyte is the MB-H solution (solvent:  $\text{H}_2\text{O}$ , 1.0 L), the electrode area is  $19.625\text{ mm}^2$  (radius: 2.5 mm). Then DMPO (0.1 mL, 0.3 M) was added to the culture plate. Finally, the DMPO-OH adduct of 1:2:2:1 characteristic peak was recorded by ESR spectrograph immediately.

### **Statistical analysis**

All digital data were analyzed with Origin (version 7.5) via one-way variance analysis and Students' t-test. The confidence levels were set as 95% and 99%.

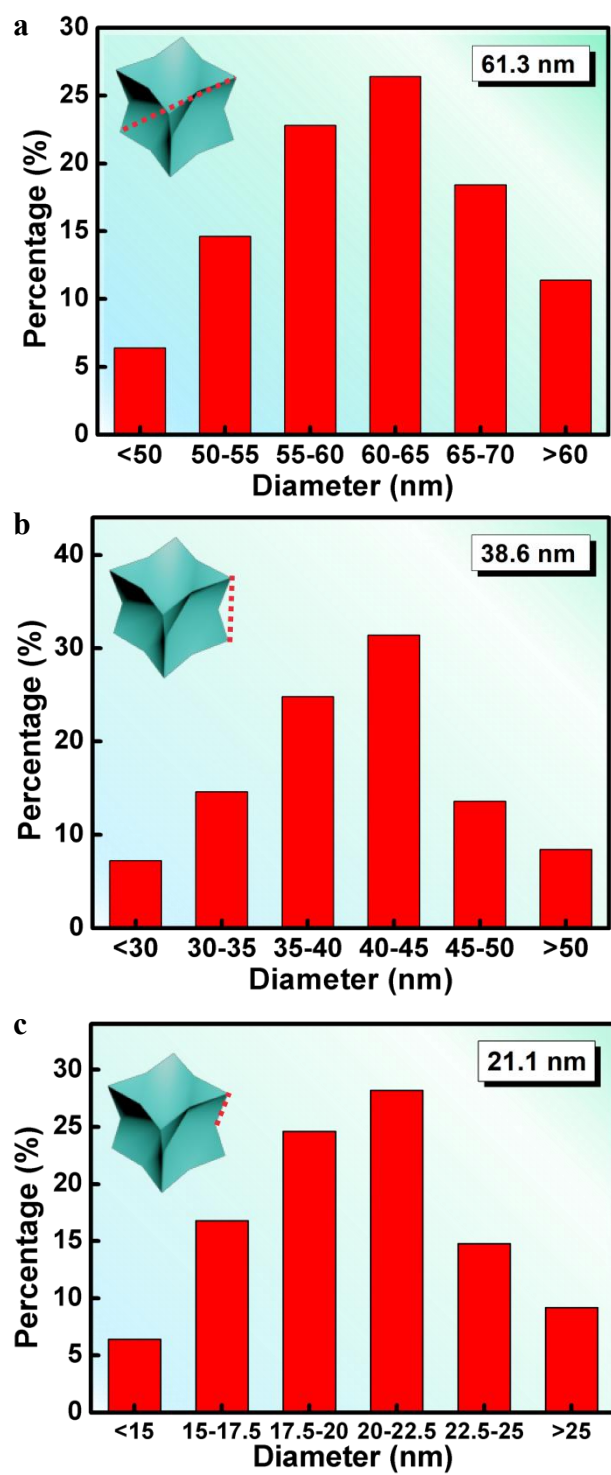

**Fig. S1.** Particle size distribution of the as-synthesized COPC-Nfs: **a)** diagonal length, **b)** edge breadth and **c)** feet length, respectively.

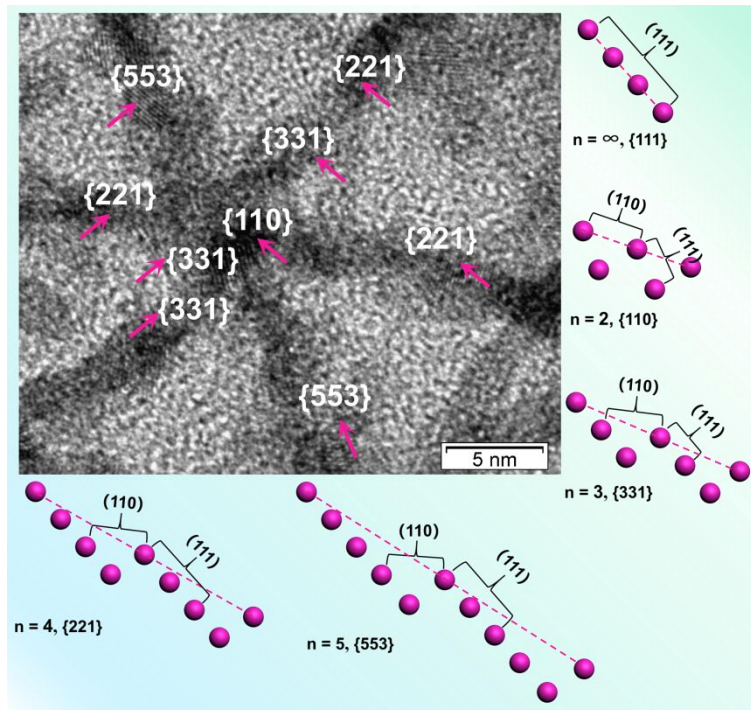

**Fig. S2.** Atomic arrangement of the obtained COPC-Nfs on the  $n$ -(111)-(111) surfaces.

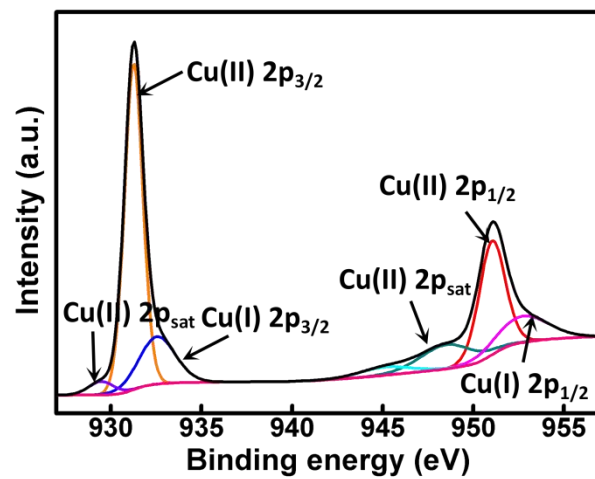

**Fig. S3.** XPS spectra of Cu 2p of the as-synthesized COPC-Nfs.

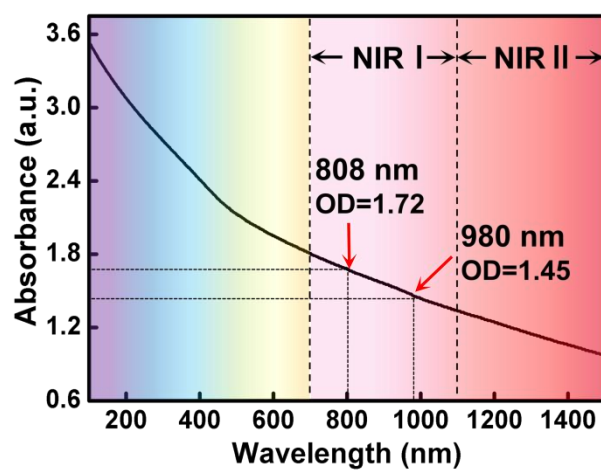

**Fig. S4.** UV-Vis absorbance spectrum of the as-synthesized COPC-Nfs.

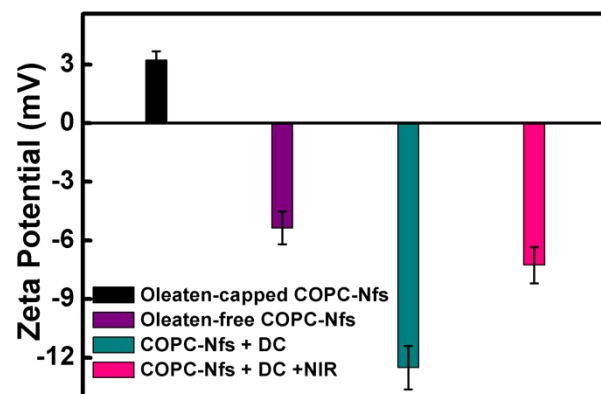

**Fig. S5.** Zeta potential of COPC-Nfs at various states.

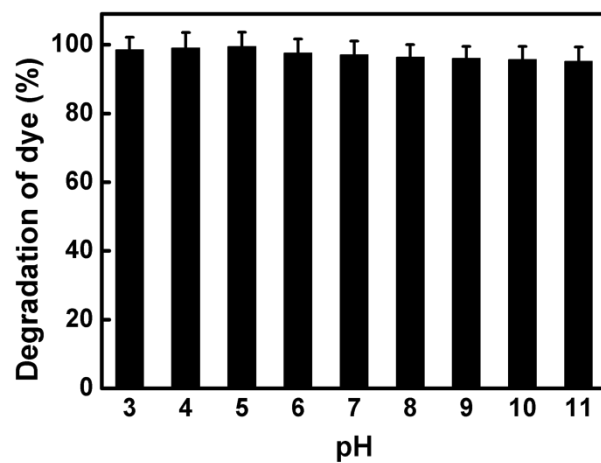

**Fig. S6.** Degradation of MB-H under different pH by using COPC-Nfs that treated with DC and NIR laser.

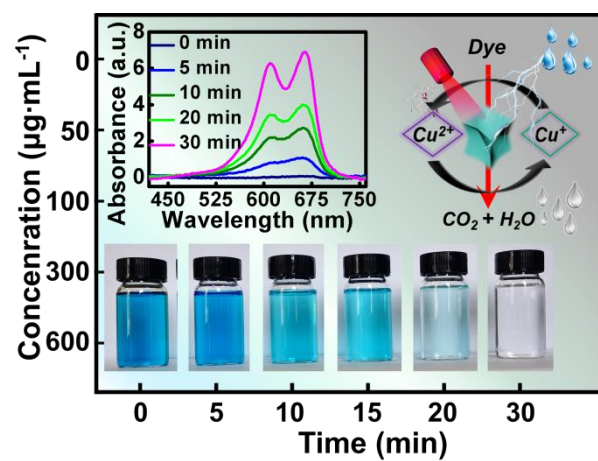

**Fig. S7.** Decoloration variance during the dye degradation process under NIR laser irradiation, inset: temperature-dependent Uv-Vis spectrum of dye degradation.

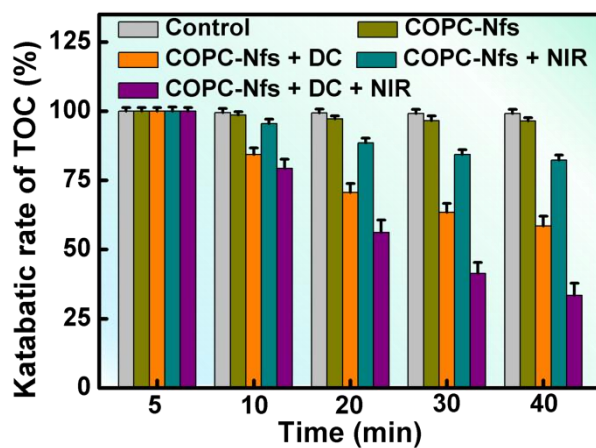

**Fig. S8.** TOC results for the dye degradation by using COPC-Nfs under different processed strategies.

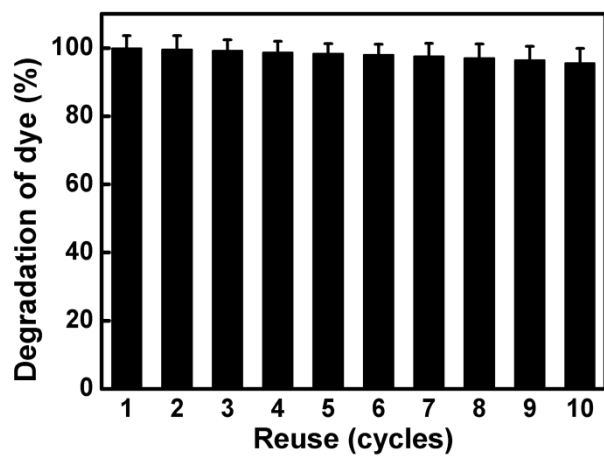

**Fig. S9.** Reusability of COPC-Nfs that treated with DC and NIR laser for MB-H removal within 10 cycles.

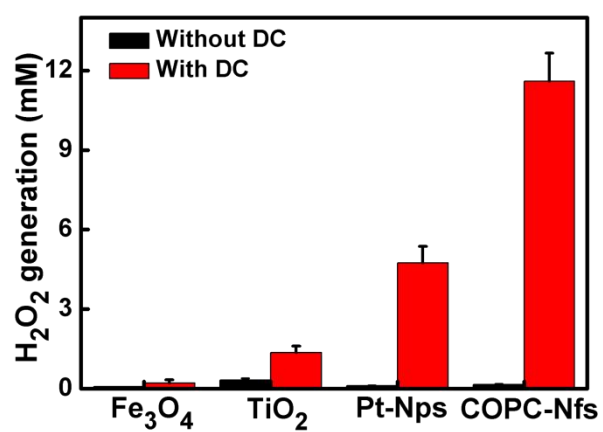

**Fig. S10.** H<sub>2</sub>O<sub>2</sub> generation profiles triggered by different nanocatalysts under DC treatment.

**Table S1.** Photo degradation of Methylene Blue with different nanocatalysts.

| <i>Catalyst</i>                    | <i>C<sub>dye</sub></i><br>(mg/L) | <i>Catalyst</i><br>(g/L) | <i>Irradiation</i><br><i>time (min)</i> | <i>Wavelength</i><br>(nm) | <i>Degradation</i><br>(%) | <i>Ref.</i>  |
|------------------------------------|----------------------------------|--------------------------|-----------------------------------------|---------------------------|---------------------------|--------------|
| MnFe <sub>2</sub> O <sub>4</sub>   | 7                                | 0.30                     | 120                                     | Visible                   | 15.1                      | 3            |
| MgFe <sub>2</sub> O <sub>4</sub>   | 7                                | 0.60                     | 180                                     | 400-700 nm                | 26.0                      | 4            |
| ZnFe <sub>2</sub> O <sub>4</sub>   | 10                               | 0.60                     | 360                                     | 400-700 nm                | 32.0                      | 4            |
| CaFe <sub>2</sub> O <sub>4</sub>   | 10                               | 1.00                     | 360                                     | >420 nm                   | 28.0                      | 5            |
| BaFe <sub>12</sub> O <sub>19</sub> | 10                               | 1.00                     | 360                                     | 420-700 nm                | 26.0                      | 6            |
| COPC-Nfs                           | 10                               | 0.30                     | 30                                      | 808 nm                    | 43.9                      | This<br>work |

**Table S2.** Photo-electro degradation of dye with different nanocatalysts.

| <i>Catalyst</i>                              | <i>Dye type</i>      | <i>C<sub>dye</sub></i> | <i>DC Power</i><br>( <i>W</i> ) | <i>Time</i><br>( <i>min</i> ) | <i>Degradation</i><br>(%) | <i>Ref.</i>  |
|----------------------------------------------|----------------------|------------------------|---------------------------------|-------------------------------|---------------------------|--------------|
| CNP/B-<br>BiVO <sub>4</sub> /WO <sub>3</sub> | Orange II            | 50 mg/L                | /                               | 180                           | 92.0                      | 7            |
| Fe (OH) <sup>2+</sup><br>/Fe (III)           | Acid Black<br>172    | 200 mg/L               | /                               | 30                            | 97.4                      | 8            |
| B-doped<br>TiO <sub>2</sub> NTs              | Naphthol<br>yellow S | 50 ppm                 | 300                             | 120                           | 100                       | 9            |
| GR/b-CD                                      | Bromophenol<br>blue  | 20 mg/L                | 300                             | 180                           | 91.5                      | 10           |
| TiO <sub>2</sub>                             | Methylene blue       | 10 mg/L                | 500                             | 180                           | 22.4                      | 11           |
| Co/TiO <sub>2</sub>                          | Methylene blue       | 10 mg/L                | 500                             | 120                           | 74.2                      | 11           |
| COPC-Nfs                                     | Methylene blue       | 10 mg/L                | 500                             | 30                            | 99.2                      | This<br>work |

## Reference

1. Li JH, Zhanga JB, Jiao XB, Ye JX, Song KN, Bao JF, Li GD, Lei K. NIR-driven PtCu-alloy nanocages via photothermal enhanced fenton catalytic degradation of pollutant dyes under neutral pH. *J Alloy Compd.* 2022; **895**: 162624.
2. Li JH, Zu XY, Liang GF, Zhang KK, Liu YL2, Li K, Luo Z, Cai KY. Octopod PtCu nanoframe for dual-modal imaging-guided synergistic photothermal radiotherapy. *Theranostics.* 2018; **8(4)**: 1042-1058.
3. Hou X, Feng J, Xu X, Zhang M. Synthesis and characterizations of spinel  $\text{MnFe}_2\text{O}_4$  nanorod by seed-hydrothermal route, *J Alloy Compd.* 2010; **491**: 258-263.
4. Chen CH, Liang YH, Zhang WD.  $\text{ZnFe}_2\text{O}_4/\text{MWCNTs}$  composite with enhanced photocatalytic activity under visible-light irradiation, *J Alloy Compd.* 2010; **501**: 168-172.
5. Dom R, Subasri R, Radha K, Borse PH. Synthesis of solar active nanocrystalline ferrite,  $\text{MFe}_2\text{O}_4$  (M: Ca, Zn, Mg) photocatalyst by microwave irradiation, *Solid State Commun.* 2011; **151**: 470-473.
6. Valero-Lunaa C, Palomares-Sánchez SA, Ruíz F. Catalytic activity of the barium hexaferrite with  $\text{H}_2\text{O}_2$ /visible light irradiation for degradation of Methylene Blue. / *Cata Today*, 2016; **266**: 110-119.
7. Peleyeju GM, Umukoro EH, Babalola JO, Arotiba OA. Solar-light-responsive titanium-sheet-based carbon nanoparticles/B- $\text{BiVO}_4/\text{WO}_3$  photoanode for the photoelectrocatalytic degradation of orange II dye water pollutant. *ACS Omega.* 2020; **5(10)**: 4743-4750.

8. Mahmoudi N, Farhadian M, Nazar AR, Eskandari P, Esfahani KN. Investigation and optimization of the performance of sono-photo-electro-Fenton process for removal of Acid Black 172 and Disperse Blue 56 from polluted water: comparison of the degradation activity with electro-Fenton-based processes. *Int J Environ Sci Te.* 2022; **19**: 1671-1682.
9. Bessegato GG, Cardoso JC, Zaroni MV. Enhanced photoelectrocatalytic degradation of an acid dye with boron-doped TiO<sub>2</sub> nanotube anodes. *Cata. Today.* 2015; **240**: 100-106.
10. Cong Q, Ren M, Zhang TT, Cheng FY, Qu J. Efficient photoelectrocatalytic performance of beta-cyclodextrin/graphene composite and effect of Clin water: degradation for bromophenol blue as a case study. *RSC Adv.* 2021; **11**, 29896-29905.
11. Du YL, Zheng ZX, Chang WZ, Liu CY, Bai ZY, Zhao XY, Wang CM. Trace Amounts of Co<sub>3</sub>O<sub>4</sub> Nano-Particles Modified TiO<sub>2</sub> Nanorod Arrays for Boosted Photoelectrocatalytic Removal of Organic Pollutants in Water. *Nanomaterials.* 2021; **11**: 214.
